# Supplementary material
Source: Springer Nature journal article supplement (https://www.springermedizin.de/resource/supplementary/12889_2010_3172_MOESM1_ESM.pdf/9488278)

# SCREENING

# INTERVENTION

# DELIVERY

# COMPLETION

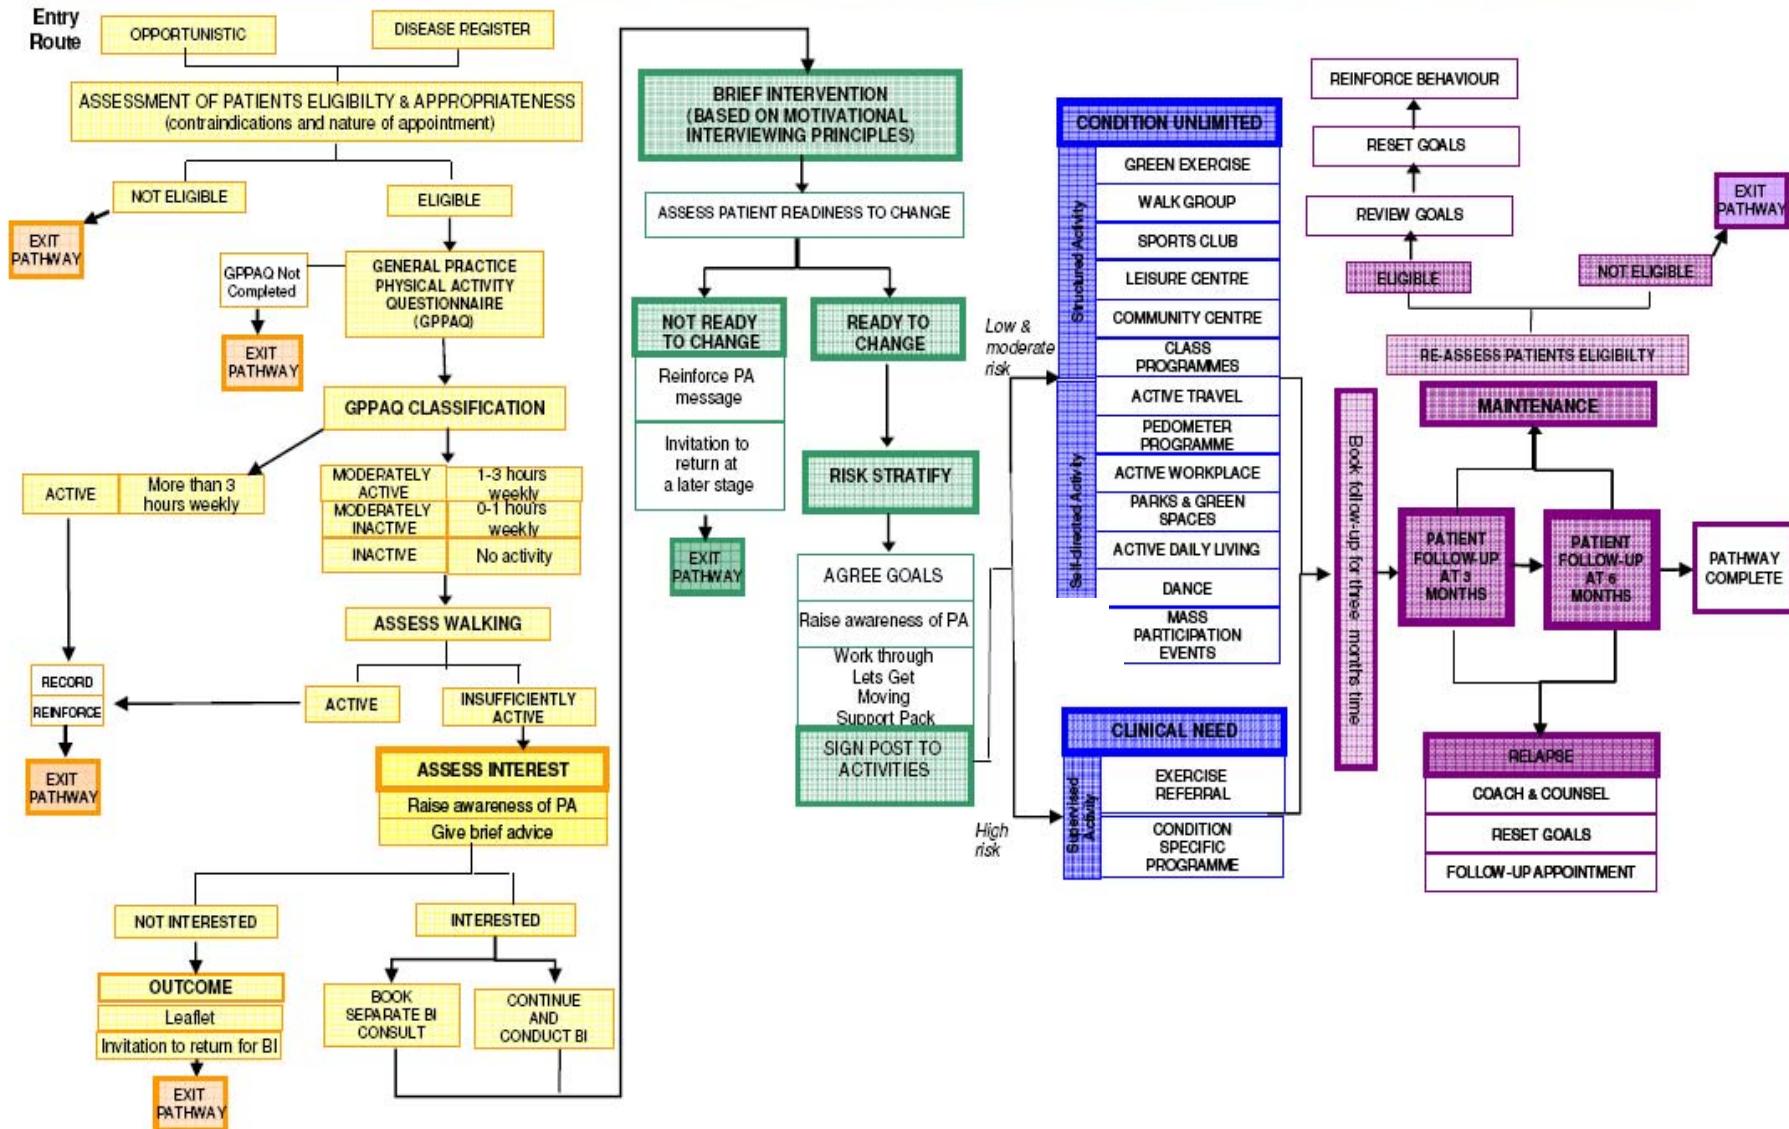

Supplement: MOESM1 [file 9488278]
